# Supplementary material for: Simultaneous detection of hydrogen and methane in breath for the diagnosis of small intestinal bacterial overgrowth by fast gas chromatography
Source: Royal Society of Chemistry journal article supplement (doi:10.1039/c8ay01451e), 2018-01-01
Supplement: c8ay01451e1.pdf [file c8ay01451e1.pdf]

Table S1 Measurements accuracy validation by standard gas with different dilution ratios

| Dilution ratio                           |             | 1   | 5/6 | 2/3 | 1/2 | 1/3 | 1/6 | 1/20 | 0 | **R <sup>2</sup> |
|------------------------------------------|-------------|-----|-----|-----|-----|-----|-----|------|---|------------------|
| CO <sub>2</sub><br>concentrat<br>ion/%   | Theoretical | 5.9 | 4.9 | 3.9 | 2.9 | 1.9 | 0.9 | 0.3  | 0 | 0.9965           |
|                                          | QuinTron    | 5.7 | 4.8 | 3.8 | 2.9 | 2.1 | 1.0 | 0.3  | 0 |                  |
|                                          | Fast GC     | 5.9 | 4.9 | 4.0 | 2.8 | 1.9 | 0.9 | 0.4  | 0 |                  |
|                                          | *Error      | 0.2 | 0.1 | 0.2 | 0.1 | 0.2 | 0.1 | 0.1  | 0 |                  |
| H <sub>2</sub><br>concentrat<br>ion/ppm  | Theoretical | 149 | 124 | 99  | 75  | 50  | 25  | 8    | 0 | 0.9978           |
|                                          | QuinTron    | 148 | 122 | 97  | 70  | 48  | 21  | 7    | 1 |                  |
|                                          | Fast GC     | 146 | 126 | 101 | 75  | 51  | 23  | 7    | 0 |                  |
|                                          | *Error      | 2   | 4   | 4   | 5   | 3   | 2   | 0    | 1 |                  |
| CH <sub>4</sub><br>concentrat<br>ion/ppm | Theoretical | 75  | 63  | 50  | 38  | 25  | 13  | 4    | 0 | 0.9967           |
|                                          | QuinTron    | 75  | 62  | 50  | 37  | 27  | 14  | 3    | 2 |                  |
|                                          | Fast GC     | 70  | 62  | 50  | 35  | 26  | 13  | 2    | 0 |                  |
|                                          | *Error      | 5   | 0   | 0   | 2   | 1   | 1   | 1    | 2 |                  |

\*Error is equal to the absolute value of the difference between the CO<sub>2</sub>/H<sub>2</sub>/CH<sub>4</sub> concentration detected by QuinTron BreathTracker and Fast GC system

\*\*R<sup>2</sup> is the correlation coefficient between the CO<sub>2</sub>/H<sub>2</sub>/CH<sub>4</sub> concentration detected by QuinTron BreathTracker and Fast GC system

Table S2 Measurements accuracy validation of CO<sub>2</sub> concentration by actual samples

| Sample No. | CO <sub>2</sub> concentration/% |         |        | Sample No. | CO <sub>2</sub> concentration/% |         |        |
|------------|---------------------------------|---------|--------|------------|---------------------------------|---------|--------|
|            | QuinTron                        | Fast GC | *Error |            | QuinTron                        | Fast GC | *Error |
| 1          | 0                               | 0       | 0      | 31         | 2.6                             | 2.5     | 0.1    |
| 2          | 0.2                             | 0.1     | 0.1    | 32         | 2.6                             | 2.5     | 0.1    |
| 3          | 0.4                             | 0.3     | 0.1    | 33         | 2.7                             | 2.5     | 0.2    |
| 4          | 0.7                             | 0.5     | 0.2    | 34         | 2.8                             | 2.8     | 0.0    |
| 5          | 0.8                             | 0.7     | 0.1    | 35         | 2.8                             | 2.7     | 0.1    |
| 6          | 0.8                             | 0.7     | 0.1    | 36         | 3.0                             | 2.9     | 0.1    |
| 7          | 0.8                             | 0.7     | 0.1    | 37         | 3.1                             | 2.9     | 0.2    |
| 8          | 0.9                             | 0.7     | 0.2    | 38         | 3.3                             | 3.3     | 0.0    |
| 9          | 1.0                             | 0.8     | 0.2    | 39         | 3.3                             | 3.2     | 0.1    |
| 10         | 1.0                             | 0.8     | 0.2    | 40         | 3.3                             | 3.1     | 0.2    |
| 11         | 1.1                             | 0.9     | 0.2    | 41         | 3.5                             | 3.6     | 0.1    |
| 12         | 1.1                             | 0.9     | 0.2    | 42         | 3.5                             | 3.4     | 0.1    |
| 13         | 1.4                             | 1.3     | 0.1    | 43         | 3.6                             | 3.4     | 0.2    |
| 14         | 1.5                             | 1.3     | 0.2    | 44         | 3.7                             | 3.7     | 0.0    |
| 15         | 1.7                             | 1.6     | 0.1    | 45         | 3.7                             | 3.8     | 0.1    |
| 16         | 1.7                             | 1.5     | 0.2    | 46         | 3.7                             | 3.6     | 0.1    |
| 17         | 1.8                             | 1.7     | 0.1    | 47         | 3.9                             | 3.8     | 0.1    |
| 18         | 1.8                             | 1.6     | 0.2    | 48         | 3.9                             | 3.9     | 0.0    |
| 19         | 2.1                             | 2.0     | 0.1    | 49         | 3.9                             | 3.7     | 0.2    |
| 20         | 2.1                             | 2.0     | 0.1    | 50         | 4.3                             | 4.3     | 0.0    |
| 21         | 2.2                             | 2.1     | 0.1    | 51         | 4.3                             | 4.3     | 0.0    |
| 22         | 2.2                             | 2.1     | 0.1    | 52         | 4.3                             | 4.2     | 0.1    |
| 23         | 2.2                             | 2.1     | 0.1    | 53         | 4.3                             | 4.2     | 0.1    |
| 24         | 2.3                             | 2.2     | 0.1    | 54         | 4.7                             | 4.7     | 0.0    |
| 25         | 2.4                             | 2.2     | 0.2    | 55         | 4.7                             | 4.5     | 0.2    |
| 26         | 2.4                             | 2.3     | 0.1    | 56         | 4.8                             | 4.6     | 0.2    |
| 27         | 2.5                             | 2.6     | 0.1    | 57         | 4.9                             | 4.8     | 0.1    |
| 28         | 2.5                             | 2.4     | 0.1    | 58         | 5.0                             | 4.9     | 0.1    |
| 29         | 2.6                             | 2.6     | 0.0    | 59         | 5.2                             | 5.0     | 0.2    |
| 30         | 2.6                             | 2.5     | 0.1    |            | **R <sup>2</sup>                |         | 0.9966 |

\*Error is equal to the absolute value of the difference between the CO<sub>2</sub> concentration detected by QuinTron BreathTracker and Fast GC system

\*\*R<sup>2</sup> is the correlation coefficient between the CO<sub>2</sub> concentration detected by QuinTron BreathTracker and Fast GC system

Table S3 Measurements accuracy validation of H<sub>2</sub> concentration by actual samples

| Sample No. | H <sub>2</sub> concentration/ppm |         |        | Sample No. | H <sub>2</sub> concentration/ppm |         |        |
|------------|----------------------------------|---------|--------|------------|----------------------------------|---------|--------|
|            | QuinTron                         | Fast GC | *Error |            | QuinTron                         | Fast GC | *Error |
| 1          | 2                                | 2       | 0      | 31         | 7                                | 7       | 0      |
| 2          | 2                                | 0       | 2      | 32         | 7                                | 7       | 0      |
| 3          | 2                                | 1       | 1      | 33         | 7                                | 6       | 1      |
| 4          | 2                                | 0       | 2      | 34         | 8                                | 11      | 3      |
| 5          | 2                                | 0       | 2      | 35         | 8                                | 9       | 1      |
| 6          | 3                                | 1       | 2      | 36         | 8                                | 9       | 1      |
| 7          | 3                                | 1       | 2      | 37         | 9                                | 8       | 1      |
| 8          | 3                                | 0       | 3      | 38         | 10                               | 10      | 0      |
| 9          | 3                                | 3       | 0      | 39         | 10                               | 9       | 1      |
| 10         | 3                                | 3       | 0      | 40         | 11                               | 13      | 2      |
| 11         | 3                                | 2       | 1      | 41         | 11                               | 11      | 0      |
| 12         | 3                                | 2       | 1      | 42         | 12                               | 15      | 3      |
| 13         | 3                                | 1       | 2      | 43         | 12                               | 14      | 2      |
| 14         | 3                                | 1       | 2      | 44         | 12                               | 13      | 1      |
| 15         | 3                                | 1       | 2      | 45         | 13                               | 15      | 2      |
| 16         | 3                                | 2       | 1      | 46         | 15                               | 19      | 4      |
| 17         | 4                                | 3       | 1      | 47         | 16                               | 17      | 1      |
| 18         | 4                                | 3       | 1      | 48         | 17                               | 18      | 1      |
| 19         | 4                                | 3       | 1      | 49         | 17                               | 19      | 2      |
| 20         | 4                                | 4       | 0      | 50         | 19                               | 20      | 1      |
| 21         | 4                                | 3       | 1      | 51         | 21                               | 22      | 1      |
| 22         | 4                                | 4       | 0      | 52         | 22                               | 23      | 1      |
| 23         | 5                                | 5       | 0      | 53         | 24                               | 24      | 0      |
| 24         | 5                                | 5       | 0      | 54         | 26                               | 25      | 1      |
| 25         | 5                                | 4       | 1      | 55         | 35                               | 32      | 3      |
| 26         | 5                                | 4       | 1      | 56         | 36                               | 35      | 1      |
| 27         | 5                                | 5       | 0      | 57         | 68                               | 69      | 1      |
| 28         | 6                                | 7       | 1      | 58         | 73                               | 75      | 2      |
| 29         | 6                                | 7       | 1      | 59         | 99                               | 97      | 2      |
| 30         | 6                                | 6       | 0      |            | **R <sup>2</sup>                 |         | 0.9931 |

\*Error is equal to the absolute value of the difference between the H<sub>2</sub> concentration detected by QuinTron BreathTracker and Fast GC system

\*\*R<sup>2</sup> is the correlation coefficient between the H<sub>2</sub> concentration detected by QuinTron BreathTracker and Fast GC system

Table S4 Measurements accuracy validation of CH<sub>4</sub> concentration by actual samples

| Sample No. | CH <sub>4</sub> concentration/ppm |         |        | Sample No. | CH <sub>4</sub> concentration/ppm |         |        |
|------------|-----------------------------------|---------|--------|------------|-----------------------------------|---------|--------|
|            | QuinTron                          | Fast GC | *Error |            | QuinTron                          | Fast GC | *Error |
| 1          | 0                                 | 0       | 0      | 31         | 1                                 | 0       | 1      |
| 2          | 0                                 | 0       | 0      | 32         | 1                                 | 1       | 0      |
| 3          | 0                                 | 0       | 0      | 33         | 2                                 | 3       | 1      |
| 4          | 0                                 | 0       | 0      | 34         | 2                                 | 3       | 1      |
| 5          | 0                                 | 1       | 1      | 35         | 2                                 | 3       | 1      |
| 6          | 0                                 | 0       | 0      | 36         | 2                                 | 3       | 1      |
| 7          | 0                                 | 2       | 2      | 37         | 2                                 | 3       | 1      |
| 8          | 0                                 | 0       | 0      | 38         | 2                                 | 3       | 1      |
| 9          | 0                                 | 0       | 0      | 39         | 2                                 | 3       | 1      |
| 10         | 0                                 | 0       | 0      | 40         | 2                                 | 4       | 2      |
| 11         | 1                                 | 2       | 1      | 41         | 2                                 | 0       | 2      |
| 12         | 1                                 | 2       | 1      | 42         | 2                                 | 3       | 1      |
| 13         | 1                                 | 0       | 1      | 43         | 2                                 | 1       | 1      |
| 14         | 1                                 | 1       | 0      | 44         | 2                                 | 4       | 2      |
| 15         | 1                                 | 1       | 0      | 45         | 2                                 | 2       | 0      |
| 16         | 1                                 | 0       | 1      | 46         | 4                                 | 6       | 2      |
| 17         | 1                                 | 0       | 1      | 47         | 5                                 | 4       | 1      |
| 18         | 1                                 | 1       | 0      | 48         | 5                                 | 4       | 1      |
| 19         | 1                                 | 2       | 1      | 49         | 6                                 | 6       | 0      |
| 20         | 1                                 | 2       | 1      | 50         | 6                                 | 8       | 2      |
| 21         | 1                                 | 0       | 1      | 51         | 6                                 | 6       | 0      |
| 22         | 1                                 | 0       | 1      | 52         | 6                                 | 5       | 1      |
| 23         | 1                                 | 1       | 0      | 53         | 8                                 | 11      | 3      |
| 24         | 1                                 | 2       | 1      | 54         | 8                                 | 8       | 0      |
| 25         | 1                                 | 2       | 1      | 55         | 8                                 | 9       | 1      |
| 26         | 1                                 | 0       | 1      | 56         | 8                                 | 7       | 1      |
| 27         | 1                                 | 1       | 0      | 57         | 9                                 | 11      | 2      |
| 28         | 1                                 | 2       | 1      | 58         | 12                                | 14      | 2      |
| 29         | 1                                 | 0       | 1      | 59         | 14                                | 16      | 2      |
| 30         | 1                                 | 0       | 1      |            | **R <sup>2</sup>                  |         | 0.9177 |

\*Error is equal to the absolute value of the difference between the CH<sub>4</sub> concentration detected by QuinTron BreathTracker and Fast GC system

\*\*R<sup>2</sup> is the correlation coefficient between the CH<sub>4</sub> concentration detected by QuinTron BreathTracker and Fast GC system
